# Supplementary material for: Polymerization of a boronate-functionalized fluorophore by double transesterification: applications to fluorescence detection of hydrogen peroxide vapor
Source: Royal Society of Chemistry journal article supplement (doi:10.1039/b809674k), 2008-01-01
Supplement: b809674k.pdf [file b809674k.pdf]

Supplementary Material (ESI) for Journal of Materials Chemistry  
This journal is © The Royal Society of Chemistry 2008

**Supporting Information**

Polymerization of a Boronate Functionalized  
Fluorophore by Double Transesterification.  
Applications to Fluorescence Detection of  
Hydrogen Peroxide Vapor

*Jason C. Sanchez and William C. Trogler\**

Department of Chemistry and Biochemistry, University of California at San Diego, 9500  
Gilman Drive, La Jolla, California 92093-0358

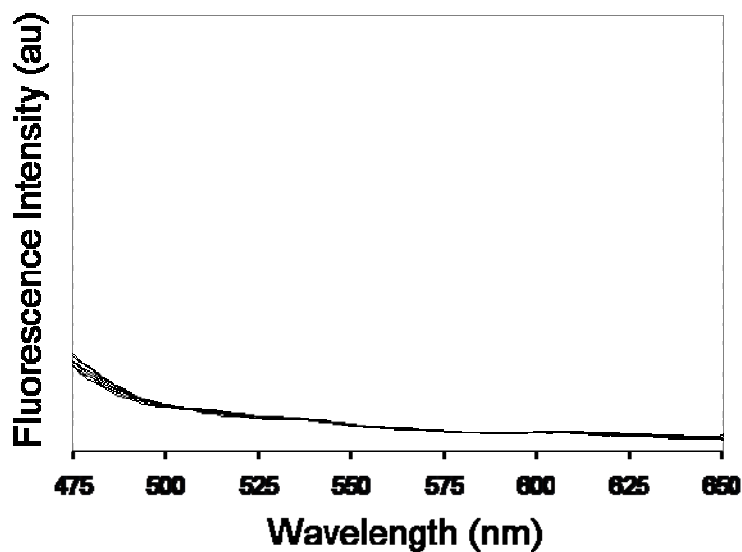

**Figure S1.** Fluorescence response of a 10 μg cm<sup>-2</sup> film of **PolyF-1** to UV light (302 nm) over a 5 h period. An increase in fluorescence intensity at 510 nm is not observed. The fluorescence intensity observed at 510 nm at each time point was used to derived 3σ for the detection limit calculations.

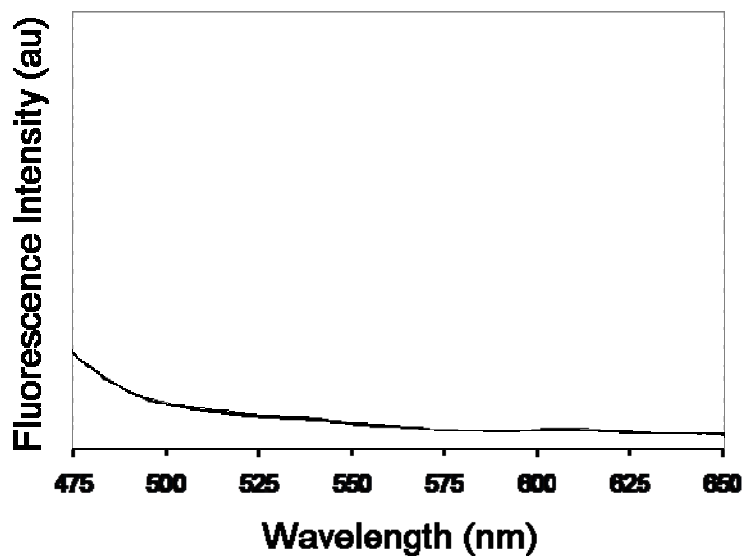

**Figure S2.** Fluorescence response of a 10 μg cm<sup>-2</sup> film of **PolyF-1** to ambient conditions over a 5 h period. An increase in fluorescence intensity at 510 nm is not observed.

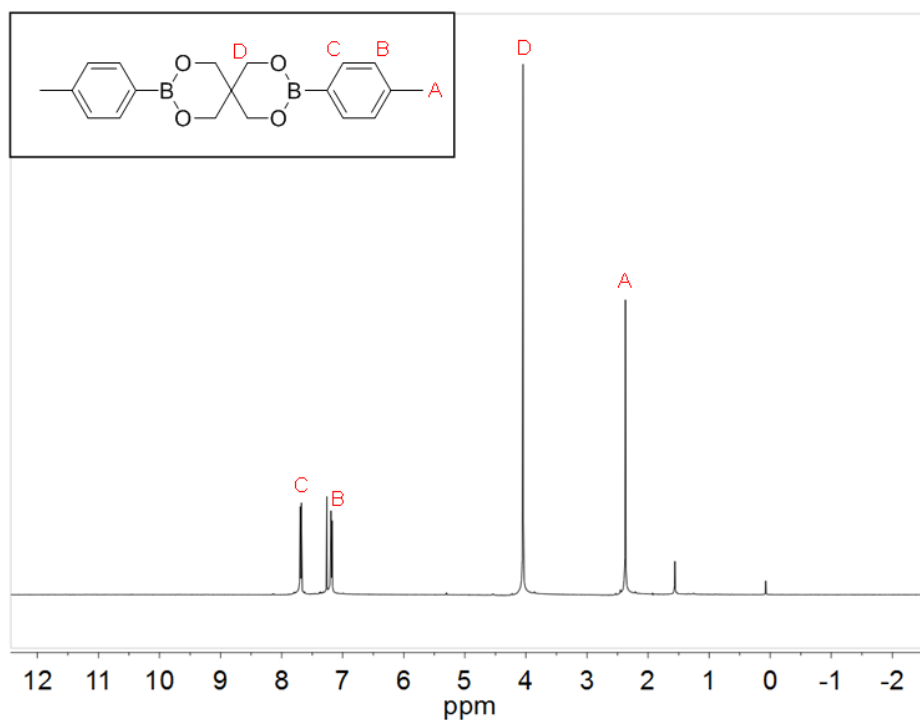

**Figure S3.**  $^1\text{H}$  NMR spectrum of dimer 1.

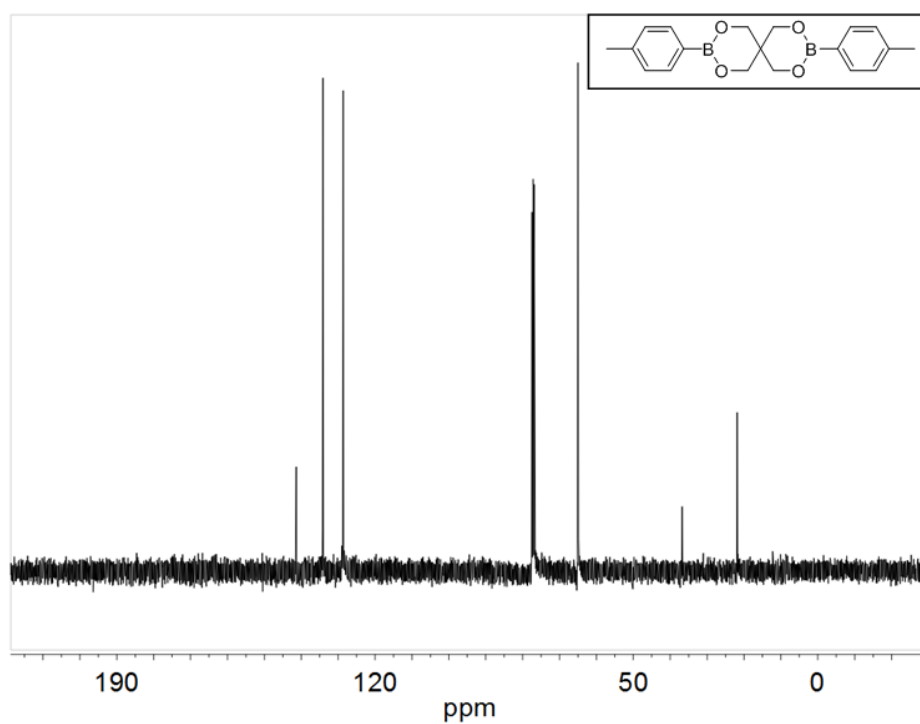

**Figure S4.**  $^{13}\text{C}$  NMR spectrum of dimer 1.
